# Supplementary material for: Pharmacodynamics and Outcomes of a De-Escalation Strategy with Half-Dose Prasugrel or Ticagrelor in East Asians Patients with Acute Coronary Syndrome: Results from HOPE-TAILOR Trial
Source: MDPI journal article supplement (doi:10.3390/jcm10122699), 2021-06-18
Supplement: s1 [file s1]

## Supplementary data

**Table S1.** Timing of platelet function testing by VerifyNow.

| Timing      | Overall<br>(n=120) | Prasugrel<br>(n=39) | Ticagrelor<br>(n=40) | Clopidogrel<br>(n =41) | <i>p</i> -Value |
|-------------|--------------------|---------------------|----------------------|------------------------|-----------------|
| At 1 month  |                    |                     |                      |                        | 0.457           |
| 9:00-12:00  | 87 (72.5)          | 27 (69.2)           | 32 (80.0)            | 28 (68.3)              |                 |
| 13:30-16:30 | 33 (27.5)          | 12 (30.8)           | 8 (20.0)             | 13 (31.7)              |                 |
| At 3 months |                    |                     |                      |                        | 0.718           |
| 9:00-12:00  | 68 (56.7)          | 20 (51.3)           | 24 (60.0)            | 24 (58.5)              |                 |
| 13:30-16:30 | 52 (43.3)          | 19 (48.7)           | 16 (40.0)            | 17 (41.5)              |                 |

The data are presented as number (%).

**Table S2.** Platelet reactivity measured by VerifyNow according to sampling time.

| Variables       | 9:00-12:00   | 13:30-16:30   | <i>p</i> -Value |
|-----------------|--------------|---------------|-----------------|
| At 1 month PRU  |              |               |                 |
| Prasugrel       | 9 (5-94)     | 48 (6-62)     | 0.843           |
| Ticagrelor      | 7 (3-30)     | 7 (4.5-64.5)  | 0.409           |
| Clopidogrel     | 151 (71-219) | 183 (159-206) | 0.203           |
| At 3 months PRU |              |               |                 |
| Prasugrel       | 82 (31-145)  | 84 (47-138)   | 0.744           |
| Ticagrelor      | 15 (6-52)    | 14 (5-44)     | 0.748           |
| Clopidogrel     | 115 (77-166) | 196 (166-224) | 0.006           |

The data are presented as median (interquartile range).

**Table S3.** Platelet reactivity status of oral P2Y12 inhibitors at chronic time points.

| Variables    | Prasugrel | Ticagrelor | Clopidogrel | <i>p</i> -Value |
|--------------|-----------|------------|-------------|-----------------|
| At 1 month   |           |            |             | <0.001          |
| HPR (208)    | 0 (0)     | 0 (0)      | 10 (24.4)   |                 |
| OPR (85-208) | 8 (20.5)  | 0 (0)      | 23 (56.1)   |                 |
| LPR (85)     | 31 (79.5) | 40 (100.0) | 8 (19.5)    |                 |
| At 3 months  |           |            |             | <0.001          |
| HPR (208)    | 0 (0)     | 0 (0)      | 8 (19.5)    |                 |
| OPR (85-208) | 19 (48.7) | 5 (12.5)   | 26 (63.4)   |                 |
| LPR (85)     | 20 (51.3) | 35 (87.5)  | 7 (17.1)    |                 |

Data are presented as number (%). HPR, high platelet reactivity; LPR, low platelet reactivity; OPR, optimal platelet reactivity.

**Table S4.** The occurrence of BARC type 1 and 2 bleedings.

| Outcomes                            | Overall<br>(n=120) | Prasugrel<br>(n=39) | Ticagrelor<br>(n=40) | Clopidogrel<br>(n=41) | p-Value |
|-------------------------------------|--------------------|---------------------|----------------------|-----------------------|---------|
| 9-month bleeding                    | 30 (25.0)          | 12 (30.8)           | 13 (32.5)            | 5 (12.2)              | 0.057   |
| BARC type 1                         | 27 (22.5)          | 11 (28.2)           | 11 (27.5)            | 5 (12.2)              |         |
| BARC type 2                         | 3 (2.5)            | 1 (2.6)             | 2 (5.0)              | 0 (0)                 |         |
| Landmark analysis at 30 days        |                    |                     |                      |                       | NA      |
| Before 30 days bleeding BARC type 1 | 8 (6.7)            | 5 (12.8)            | 1 (2.5)              | 2 (4.9)               | 0.170   |
| Beyond 30 days bleeding             | 22 (19.6)          | 7 (20.6)            | 12 (30.8)            | 3 (7.7)               | 0.035   |
| BARC type 1                         | 19 (17.0)          | 6 (17.6)            | 10 (25.6)            | 3 (7.7)               |         |
| BARC type 2                         | 3 (2.7)            | 1 (2.9)             | 2 (5.1)              | 0 (0)                 |         |

Data are presented as number (%). BARC, Bleeding Academic Research Consortium.

**Table S5.** The efficacy outcomes at 9 months clinical follow-ups.

| Outcomes      | Overall<br>(n=120) | Prasugrel<br>(n=39) | Ticagrelor<br>(n=40) | Clopidogrel<br>(n=41) | p-Value |
|---------------|--------------------|---------------------|----------------------|-----------------------|---------|
| MACCE         | 2 (1.7)            | 0 (0)               | 1 (2.5)              | 1 (2.4)               | NA      |
| Cardiac death | 0 (0)              | 0 (0)               | 0 (0)                | 0 (0)                 | -       |
| MI            | 1 (0.8)            | 0 (0)               | 1 (2.5)              | 0 (0)                 | -       |
| TVR           | 2 (1.7)            | 0 (0)               | 1 (2.5)              | 1 (2.4)               | NA      |
| Stroke        | 0 (0)              | 0 (0)               | 0 (0)                | 0 (0)                 | -       |

Data are presented as number (%). MACCE, major adverse cardiac and cerebrovascular events; MI, myocardial infarction; TVR, target vessel revascularization. NA, not applicable.

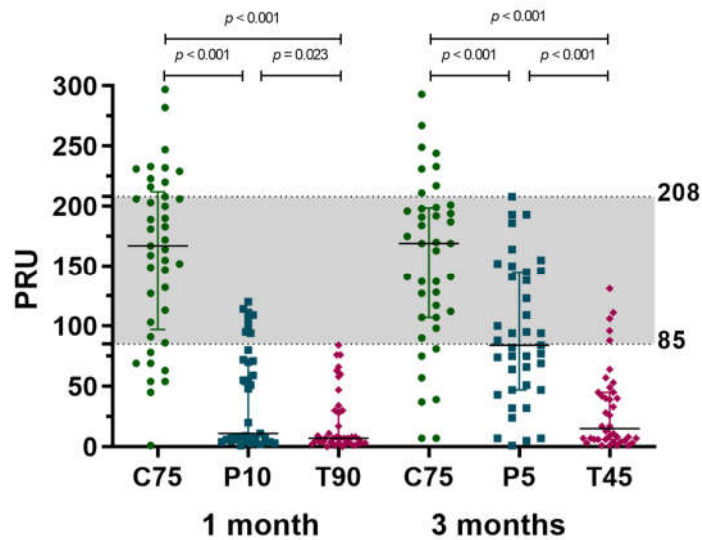**Figure S1.** Pharmacodynamic comparisons between P2Y12 inhibitors at chronic time points in accordance with the VerifyNow P2Y12 method at 1 and 3 months. Scatter plots representing P2Y12 reaction unit (PRU) results for study groups. Gray area indicates optimal platelet reactivity (OPR, defined as PRU values between 85 and 208).
